# Supplementary material
Source: publisher site journal article supplement (https://static.cambridge.org/content/id/urn:cambridge.org:id:article:S1368980019002271/resource/name/S1368980019002271supp002.pdf)
Supplement: Supplementary file 1 [file S1368980019002271supp002.pdf]

**Supplementary File 1: Overview on the harmonization of the 21 potential risk factors of malnutrition. Categorization used in the original studies (vs. indicates which categories were summarized during harmonization) as well as categorization used in this secondary data analyses is given**

|                      | <b>Community<br/>(KORA-Age)</b>                                                   | <b>Geriatric Day Hospital</b>                               | <b>Home Care<br/>(ErnSiPP)</b>                                                                                                                           | <b>Nursing Home</b>                                         | <b>Harmonized variable</b>          |
|----------------------|-----------------------------------------------------------------------------------|-------------------------------------------------------------|----------------------------------------------------------------------------------------------------------------------------------------------------------|-------------------------------------------------------------|-------------------------------------|
| <b>Demographics</b>  |                                                                                   |                                                             |                                                                                                                                                          |                                                             |                                     |
| Living alone         | Do you live alone?<br>yes, no                                                     | Do you live alone?<br>yes, no                               | With whom does the<br>home care receiver live<br>together?<br>alone, with partner, with<br>children, with partner and<br>children, with other<br>persons | -                                                           | Living alone, living with<br>others |
| <b>Health Status</b> |                                                                                   |                                                             |                                                                                                                                                          |                                                             |                                     |
| Polypharmacy         | Number of prescribed<br>drugs                                                     | Takes more than 3<br>prescription drugs per day<br>yes, no  | Number of prescribed<br>drugs                                                                                                                            | Number of prescribed<br>drugs                               | > 3 drugs vs. ≤ 3 drugs             |
| Multimorbidity       | Number chronic diseases                                                           | Number chronic diseases                                     | Number chronic diseases                                                                                                                                  | Number chronic diseases                                     | ≥ 2 diseases vs. < 2<br>diseases    |
| Diabetes<br>Mellitus | Diabetes Mellitus<br>yes, no                                                      | Diabetes Mellitus<br>yes, no                                | Diabetes Mellitus<br>yes, no                                                                                                                             | Diabetes Mellitus<br>yes, no                                | Yes vs. no                          |
| Heart Diseases       | Myocardial infarction<br>yes, no<br>Heart complaint, heart<br>diseases<br>yes, no | Heart failure<br>yes, no<br>Other heart diseases<br>yes, no | Heart failure<br>yes, no<br>Other heart diseases<br>yes, no                                                                                              | Heart failure<br>yes, no<br>Other heart diseases<br>yes, no | Yes vs. no                          |
| Stroke               | Stroke<br>yes, no                                                                 | Stroke<br>yes, no                                           | Stroke<br>yes, no                                                                                                                                        | Stroke<br>yes, no                                           | Yes vs. no                          |
| Cancer               | Cancer (last 3 years)<br>yes, no                                                  | Cancer<br>yes, no                                           | Cancer<br>yes, no                                                                                                                                        | Cancer<br>yes, no                                           | Yes vs. no                          |

|                          | <b>Community<br/>(KORA-Age)</b>                                                                     | <b>Geriatric Day Hospital</b>                                                                                   | <b>Home Care<br/>(ErnSiPP)</b>                                                                      | <b>Nursing Home</b>                                                                                 | <b>Harmonized variable</b>                                                                |
|--------------------------|-----------------------------------------------------------------------------------------------------|-----------------------------------------------------------------------------------------------------------------|-----------------------------------------------------------------------------------------------------|-----------------------------------------------------------------------------------------------------|-------------------------------------------------------------------------------------------|
| Respiratory Diseases     | Asthma, Emphysema, Chronic Obstructive Disease<br>yes, no                                           | Respiratory Diseases<br>yes, no                                                                                 | Respiratory Diseases<br>yes, no                                                                     | Respiratory Diseases<br>yes, no                                                                     | Yes vs. no                                                                                |
| GI diseases              | GI diseases<br>yes, no                                                                              | Gastritis, intestinal diseases<br>yes, no<br>Inflammatory Bowel disease<br>yes, no                              | Gastritis, intestinal diseases<br>yes, no<br>Inflammatory Bowel disease<br>yes, no                  | Gastritis, intestinal diseases<br>yes, no<br>Inflammatory Bowel disease<br>yes, no                  | Yes vs. no                                                                                |
| Renal diseases           | Renal diseases<br>yes, no                                                                           | Renal diseases<br>yes, no                                                                                       | Renal diseases<br>yes, no                                                                           | Renal diseases<br>yes, no                                                                           | Yes vs. no                                                                                |
| Arthropathy              | Arthritis, Rheumatism, Arthrosis<br>yes, no                                                         | Arthropathy<br>yes, no                                                                                          | Arthropathy<br>yes, no                                                                              | Arthropathy<br>yes, no                                                                              | Yes vs. no                                                                                |
| <b>Mental Function</b>   |                                                                                                     |                                                                                                                 |                                                                                                     |                                                                                                     |                                                                                           |
| Cognitive Impairment     | TICS-m $\leq$ 31 points<br>cognitive impairment                                                     | MMSE<br>< 24 points cognitive impairment                                                                        | MMSE<br>< 24 points cognitive impairment                                                            | MMSE<br>< 24 points cognitive impairment                                                            | cognitive impairment vs. no cognitive impairment                                          |
| Depressive Symptoms      | Geriatric Depression Scale                                                                          | Geriatric Depression Scale                                                                                      | Geriatric Depression Scale                                                                          | Geriatric Depression Scale                                                                          | > 5 points depressive symptoms vs. $\leq$ 5 points no depressive symptoms, not assessable |
| <b>Physical Function</b> |                                                                                                     |                                                                                                                 |                                                                                                     |                                                                                                     |                                                                                           |
| Mobility Limitations     | HAQ<br>Mobility limitations<br>Are you able to walk outside on flat ground? unable to do, with much | Barthel Index<br>Mobility limitations<br>Can't move at least 50 m, wheelchair bound, can move 50 m with support | Barthel Index<br>Mobility<br>Can't move at least 50 m, wheelchair bound, can move 50 m with support | Barthel Index<br>Mobility<br>Can't move at least 50 m, wheelchair bound, can move 50 m with support | yes vs. no                                                                                |

|                                        | <b>Community<br/>(KORA-Age)</b>                                                                                                                                                                                              | <b>Geriatric Day Hospital</b>                                                                                                  | <b>Home Care<br/>(ErnSiPP)</b>                                                                                                 | <b>Nursing Home</b>                                                                                                            | <b>Harmonized variable</b> |
|----------------------------------------|------------------------------------------------------------------------------------------------------------------------------------------------------------------------------------------------------------------------------|--------------------------------------------------------------------------------------------------------------------------------|--------------------------------------------------------------------------------------------------------------------------------|--------------------------------------------------------------------------------------------------------------------------------|----------------------------|
|                                        | difficulty, with some difficulty <b>vs.</b> without any difficulty                                                                                                                                                           | <b>vs.</b> can move 50 m independently                                                                                         | <b>vs.</b> can move 50 m independently                                                                                         | <b>vs.</b> can move 50 m independently                                                                                         |                            |
| Difficulties with eating               | HAQ<br>Mobility limitations<br>1. Are you able to cut meat with a knife?<br>2. Are you able to lift a full glass to the mouth?<br>unable to do, with much difficulty, with some difficulty <b>vs.</b> without any difficulty | Barthel Index<br>Eating difficulties<br>Completely dependent with eating, needs help with eating <b>vs.</b> eats independently | Barthel Index<br>Eating difficulties<br>Completely dependent with eating, needs help with eating <b>vs.</b> eats independently | Barthel Index<br>Eating difficulties<br>Completely dependent with eating, needs help with eating <b>vs.</b> eats independently | yes <b>vs.</b> no          |
| <b>Dietary Intake Related Problems</b> |                                                                                                                                                                                                                              |                                                                                                                                |                                                                                                                                |                                                                                                                                |                            |
| Nausea                                 | Nausea or stomach upset<br>yes, no                                                                                                                                                                                           | Do you suffer from nausea?<br>yes, no                                                                                          | Does the home care receiver suffer from nausea?<br>Often, occasionally, infrequently <b>vs.</b> never                          | Does the resident suffer from nausea?<br>yes, no                                                                               | yes <b>vs.</b> no          |
| Chewing problems                       | In the past month did you have difficulties with chewing of foods due to problems with teeth, oral problems or problems with dentures?<br>yes, no                                                                            | Do you have difficulties with chewing?<br>yes, no                                                                              | Does the home care receiver have difficulties with chewing?<br>Yes <b>vs.</b> only with hard foods, no                         | Does the resident have difficulties with chewing?<br>severe, moderate, slight <b>vs.</b> no                                    | yes <b>vs.</b> no          |
| Swallowing problems                    | Do you get cough, retch or pain during swallowing for foods or fluids?                                                                                                                                                       | Do you have swallowing difficulties?<br>yes, no                                                                                | Does the home care receiver have swallowing difficulties?                                                                      | Does the resident have swallowing difficulties?<br>severe, moderate, slight                                                    | yes <b>vs.</b> no          |

|                                  | <b>Community<br/>(KORA-Age)</b>                                                                                                       | <b>Geriatric Day Hospital</b>                                                                                               | <b>Home Care<br/>(ErnSiPP)</b>                                                                                              | <b>Nursing Home</b>                                                                                                         | <b>Harmonized variable</b>          |
|----------------------------------|---------------------------------------------------------------------------------------------------------------------------------------|-----------------------------------------------------------------------------------------------------------------------------|-----------------------------------------------------------------------------------------------------------------------------|-----------------------------------------------------------------------------------------------------------------------------|-------------------------------------|
|                                  | Often/almost always,<br>occasionally, infrequently,<br>never                                                                          |                                                                                                                             | yes, no                                                                                                                     | vs. no                                                                                                                      |                                     |
| Poor appetite                    | How would you describe<br>your appetite?<br>poor, less good vs. good,<br>very good                                                    | Do you suffer from poor<br>appetite?<br>yes, no                                                                             | How would you describe<br>the appetite of the home<br>care receiver?<br>poor, moderate vs. good,<br>very good               | Does the resident suffer<br>from poor appetite?<br>severely, moderately,<br>slightly vs. no                                 | yes vs. no                          |
| <b>Dietary Behavior</b>          |                                                                                                                                       |                                                                                                                             |                                                                                                                             |                                                                                                                             |                                     |
| Low<br>fruit/vegetable<br>intake | How many serving of<br>fruit, vegetables and salad<br>do you usually per day?<br>(SCREEN II)<br><2, 2, 3, 4, ≥ 5 servings             | Consumes two or more<br>servings of fruit or<br>vegetables<br>per day? (MNA)<br>yes, no                                     | Consumes two or more<br>servings of fruit or<br>vegetables<br>per day? (MNA)<br>yes, no                                     | Consumes two or more<br>servings of fruit or<br>vegetables<br>per day? (MNA)<br>yes, no                                     | <2 serving vs. ≥ 2<br>servings      |
| Low fluid intake                 | How much do you drink<br>usually per day?<br>(SCREEN II)<br>< 2 glasses, about 2<br>glasses, 3-4 glasses, 5-7<br>glasses, ≥ 8 glasses | How much fluid (water,<br>juice, coffee, tea, milk ...)<br>is consumed per day?<br>(MNA)<br>< 3 cups, 3-5 cups, > 5<br>cups | How much fluid (water,<br>juice, coffee, tea, milk ...)<br>is consumed per day?<br>(MNA)<br>< 3 cups, 3-5 cups, > 5<br>cups | How much fluid (water,<br>juice, coffee, tea, milk ...)<br>is consumed per day?<br>(MNA)<br>< 3 cups, 3-5 cups, > 5<br>cups | < 3 glasses vs. ≥ 3<br>glasses/cups |

MMSE Mini Mental State Examination, TICS-m Telephone Interview for Cognitive Status-modified, HAQ Health Assessment Questionnaire, MNA Mini Nutritional Assessment
